# Supplementary material for: Inhibition of α-glucosidase and α-amylase by flavonoid glycosides from Lu'an GuaPian tea: molecular docking and interaction mechanism
Source: Royal Society of Chemistry journal article supplement (doi:10.1039/c8fo00562a), 2018-01-01

**Inhibition of flavonoid glycosides from Lu'an GuaPian tea on  $\alpha$ -glucosidase and  
 $\alpha$ -amylase: molecular docking and interaction mechanism**

Fang Hua,<sup>a,b</sup> Peng Zhou,<sup>c</sup> Hao-Yue Wu,<sup>a</sup> Gang-Xu Chu,<sup>a</sup> Zhong-Wen Xie,<sup>a</sup>

Guan-Hu Bao <sup>a,\*</sup>

<sup>a</sup> Natural Products Laboratory, International Joint Lab of Tea Chemistry and Health Effects, State Key Laboratory of Tea Plant Biology and Utilization, Anhui Agricultural University, Hefei, 230036 People's Republic of China

<sup>b</sup> Pharmacy School, Anhui Xinhua University, Hefei 230088, People's Republic of China

<sup>c</sup> Department of Integrated Traditional Chinese and Western Medicine, Anhui University of Chinese Medicine, Research Institute of Integrated Traditional Chinese and Western Medicine, Anhui Academy of Chinese Medicine, Hefei 230038, People's Republic of China

**List of supporting information**

**Fig. S1** Chemical structures of **1-12** and **14** from Lu'an GuaPian tea

**Fig. S2** 3D pictures of blank receptor  $\alpha$ -glucosidase

**Fig. S3** 3D pictures of the complex  $\alpha$ -glucosidase-**9**

**Fig. S4** 3D pictures of the complex  $\alpha$ -glucosidase-**13**

**Fig. S5** 3D pictures of the complex  $\alpha$ -glucosidase-**14**

**Fig. S6** 3D pictures of the complex  $\alpha$ -glucosidase-**15**

**Fig. S7** 3D pictures of blank receptor  $\alpha$ -amylase

**Fig. S8** 3D pictures of the complex  $\alpha$ -amylase-**6**

**Fig. S9** 3D pictures of the complex  $\alpha$ -amylase-**7**

**Fig. S10** 3D pictures of the complex  $\alpha$ -amylase-**8**

**Fig. S11** 3D pictures of the complex  $\alpha$ -amylase-9

**Fig. S12** 3D pictures of the complex  $\alpha$ -amylase-13

**Fig. S13** 3D pictures of the complex  $\alpha$ -amylase-14

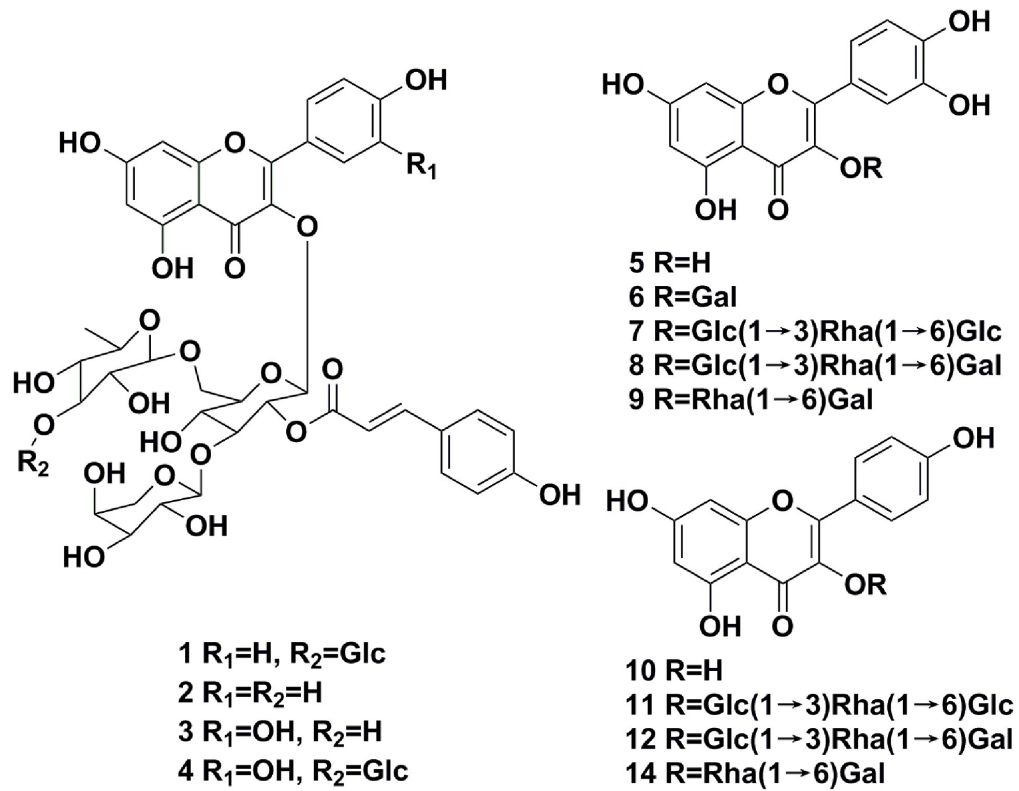

**Fig. S1** Chemical structures of 1-12 and 14 from Lu'an GuaPian tea

**Fig. S2** 3D pictures of blank receptor  $\alpha$ -glucosidase

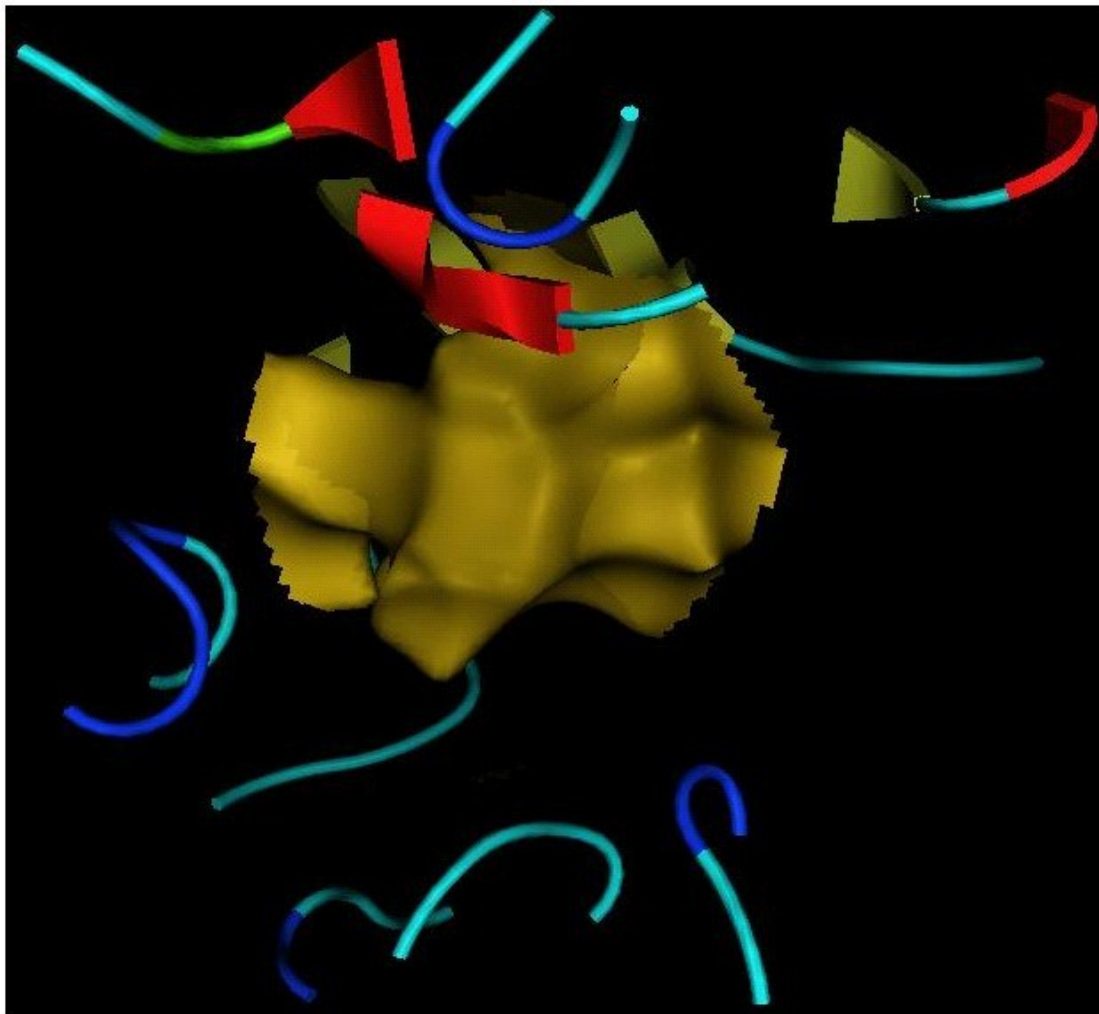

**Fig. S3** 3D pictures of the complex  $\alpha$ -glucosidase-9

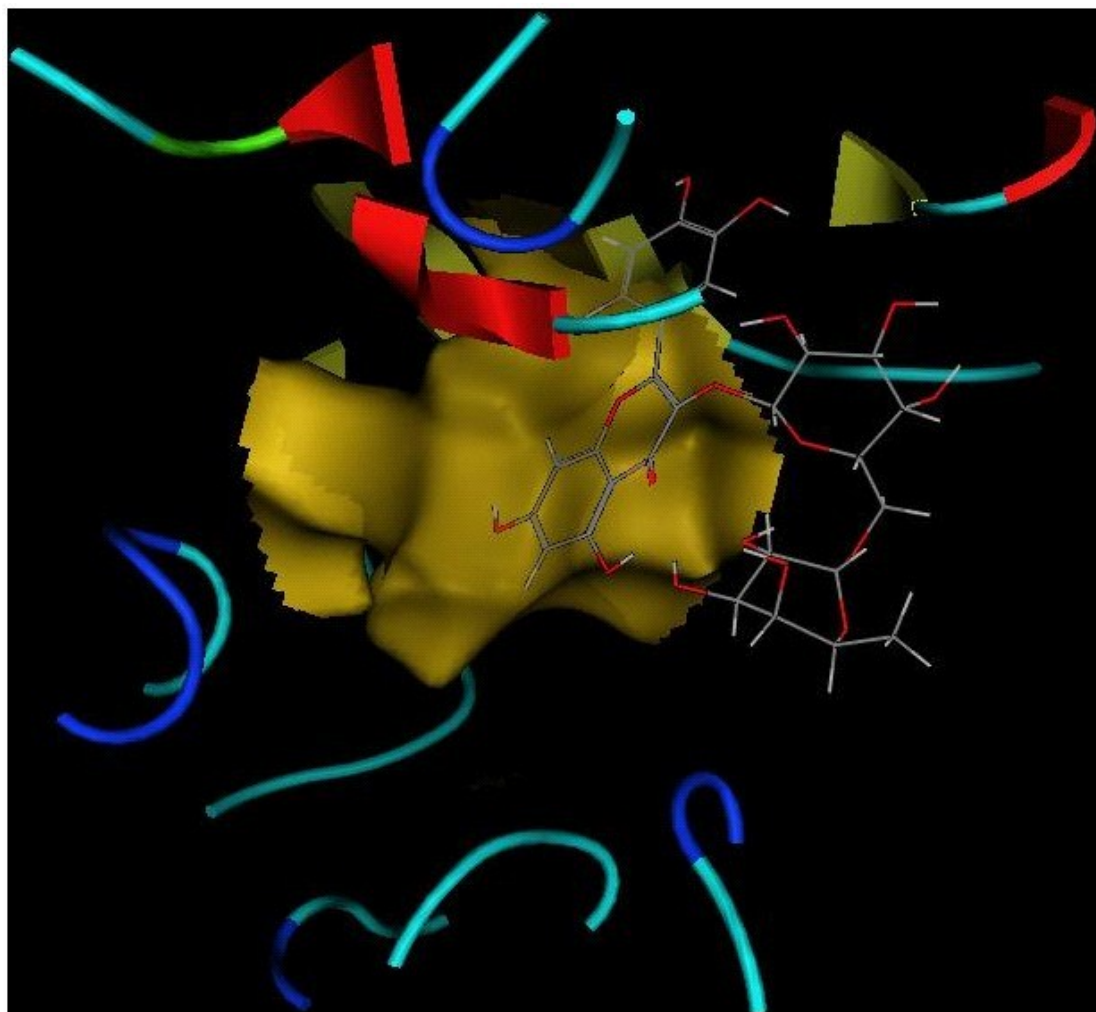

**Fig. S4** 3D pictures of the complex  $\alpha$ -glucosidase-13

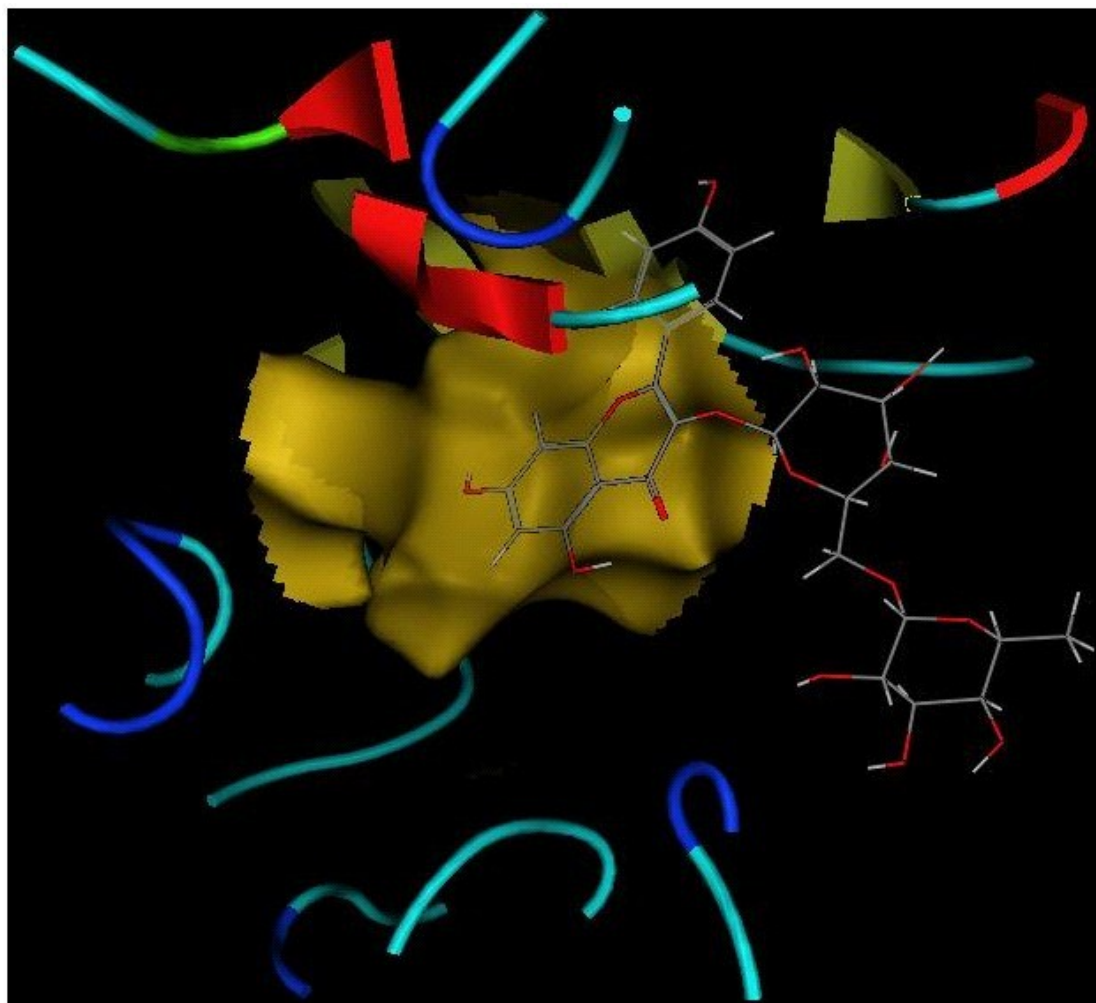

**Fig. S5** 3D pictures of the complex  $\alpha$ -glucosidase-14

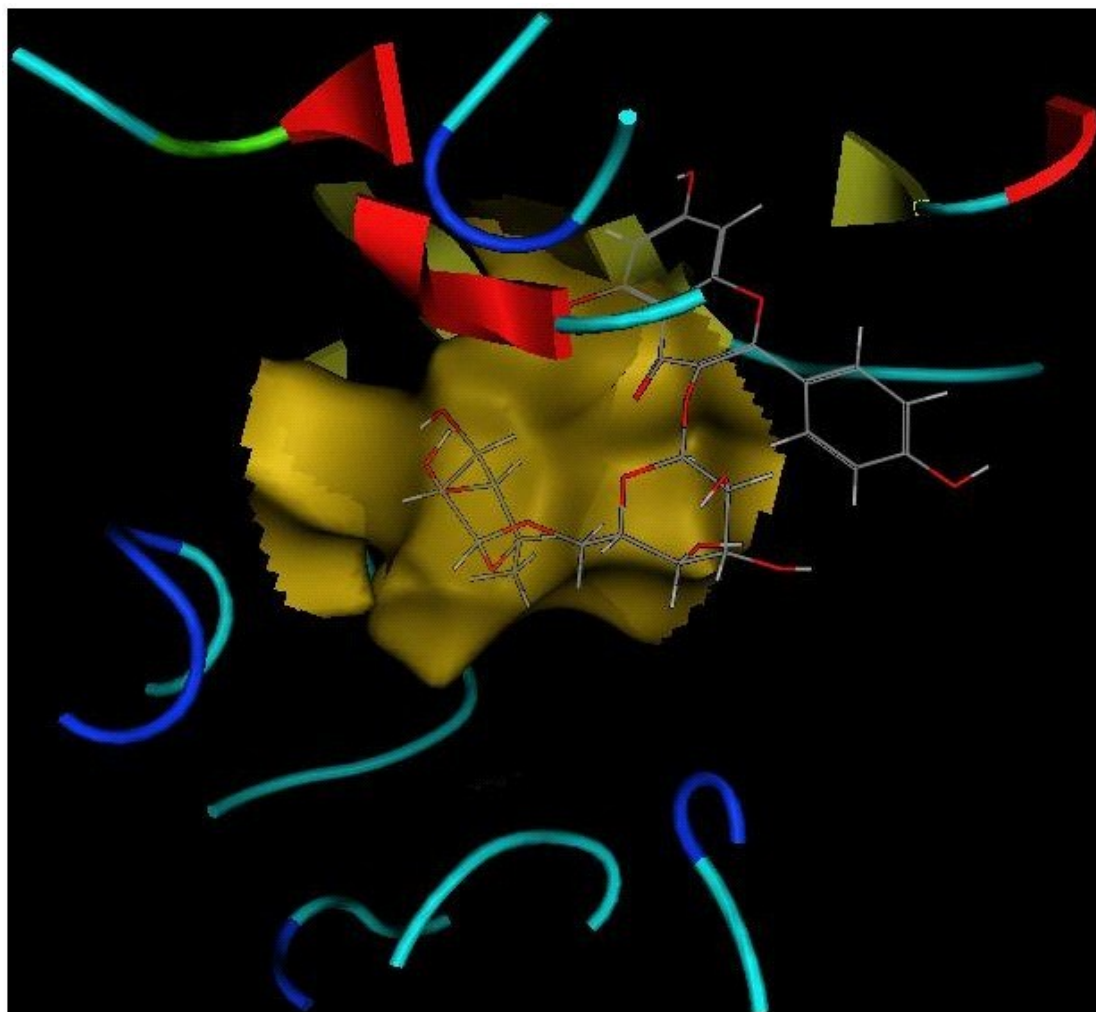

**Fig. S6** 3D pictures of the complex  $\alpha$ -glucosidase-15

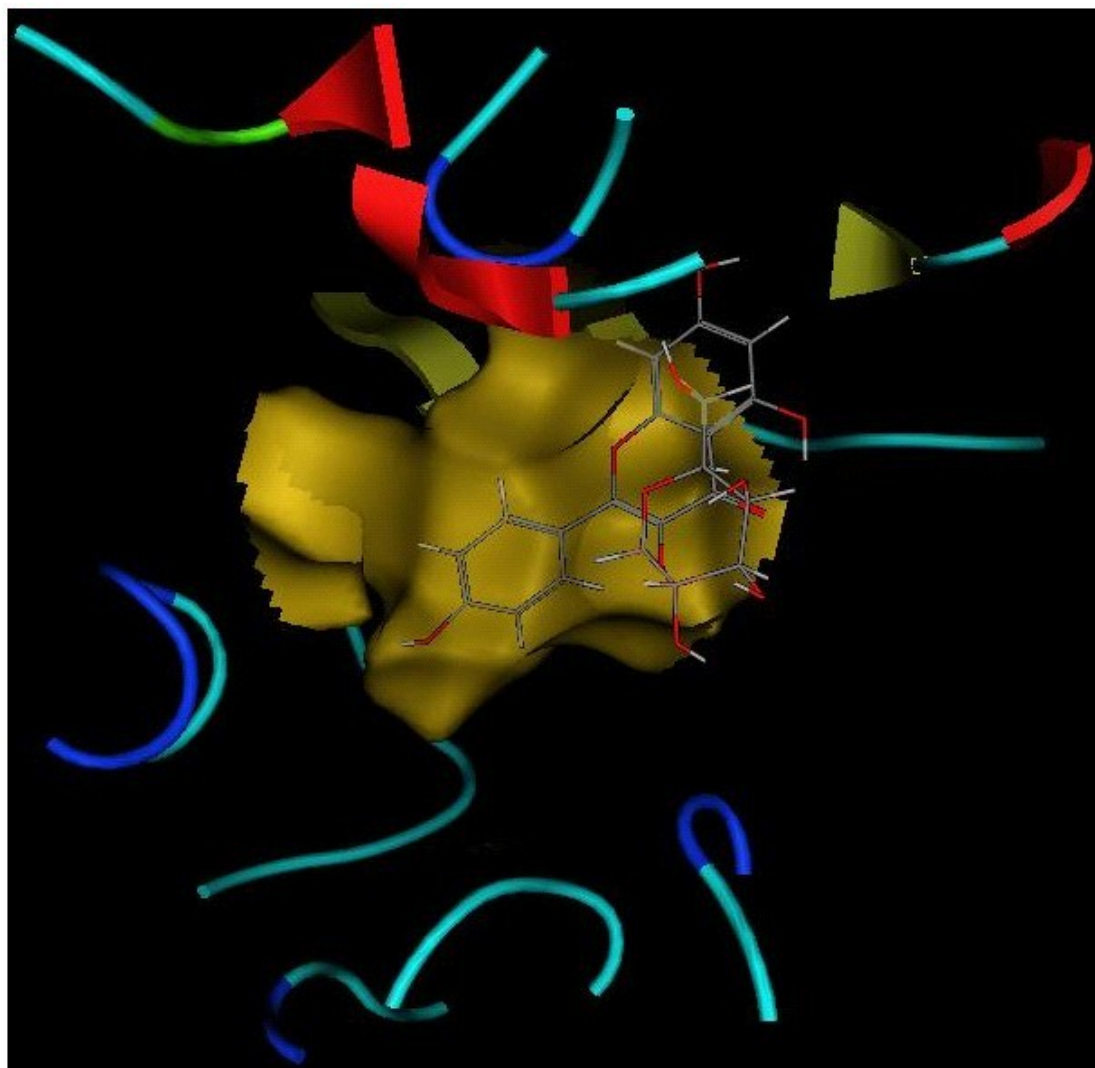



**Fig. S7** 3D pictures of blank receptor  $\alpha$ -amylase

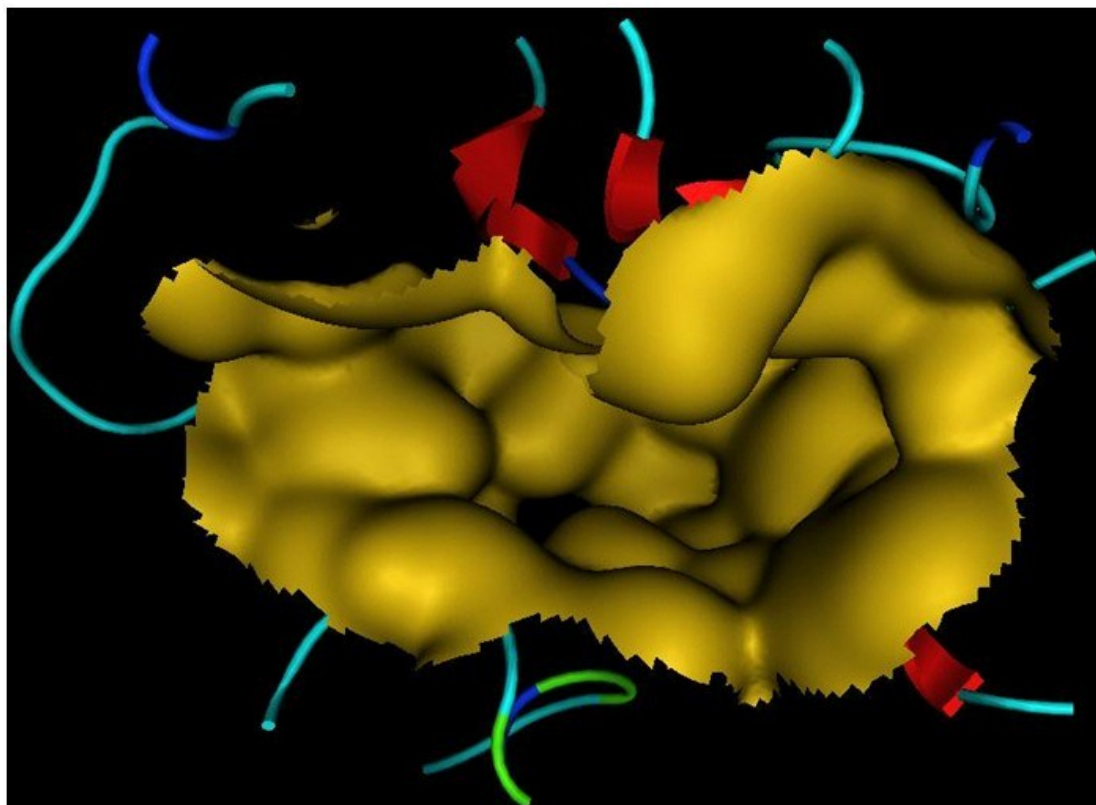

**Fig. S8** 3D pictures of the complex  $\alpha$ -amylase-6

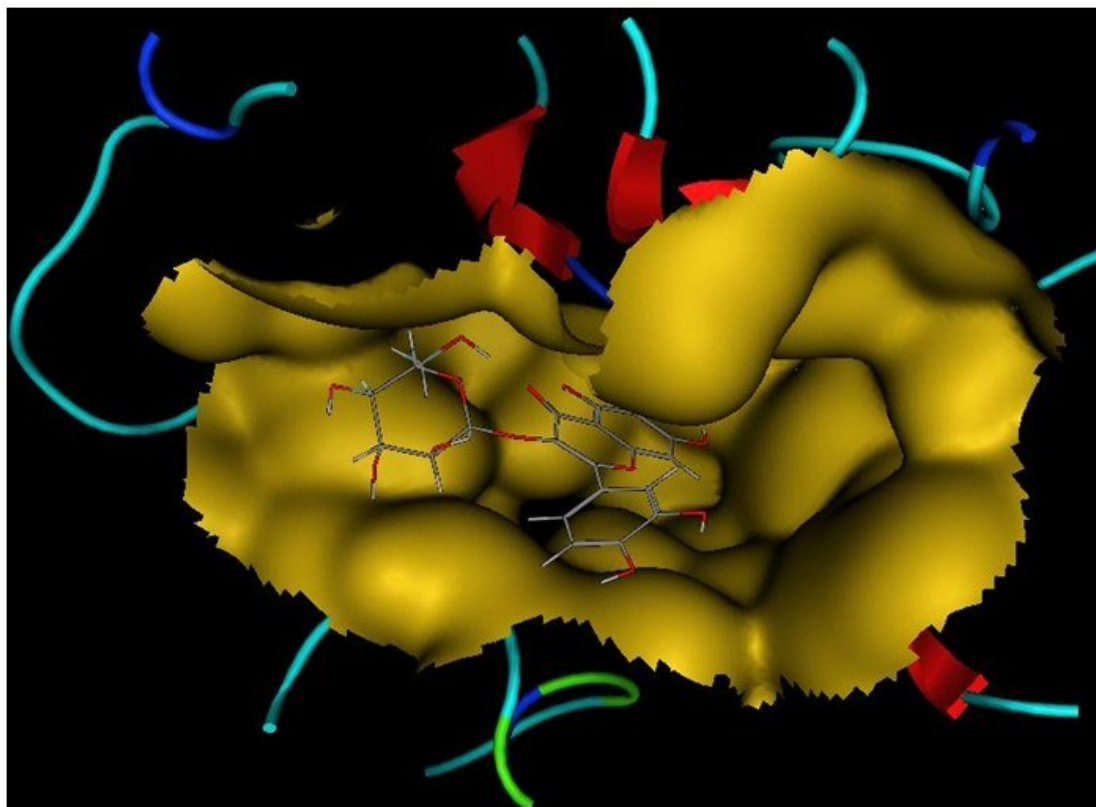

**Fig. S9** 3D pictures of the complex  $\alpha$ -amylase-7

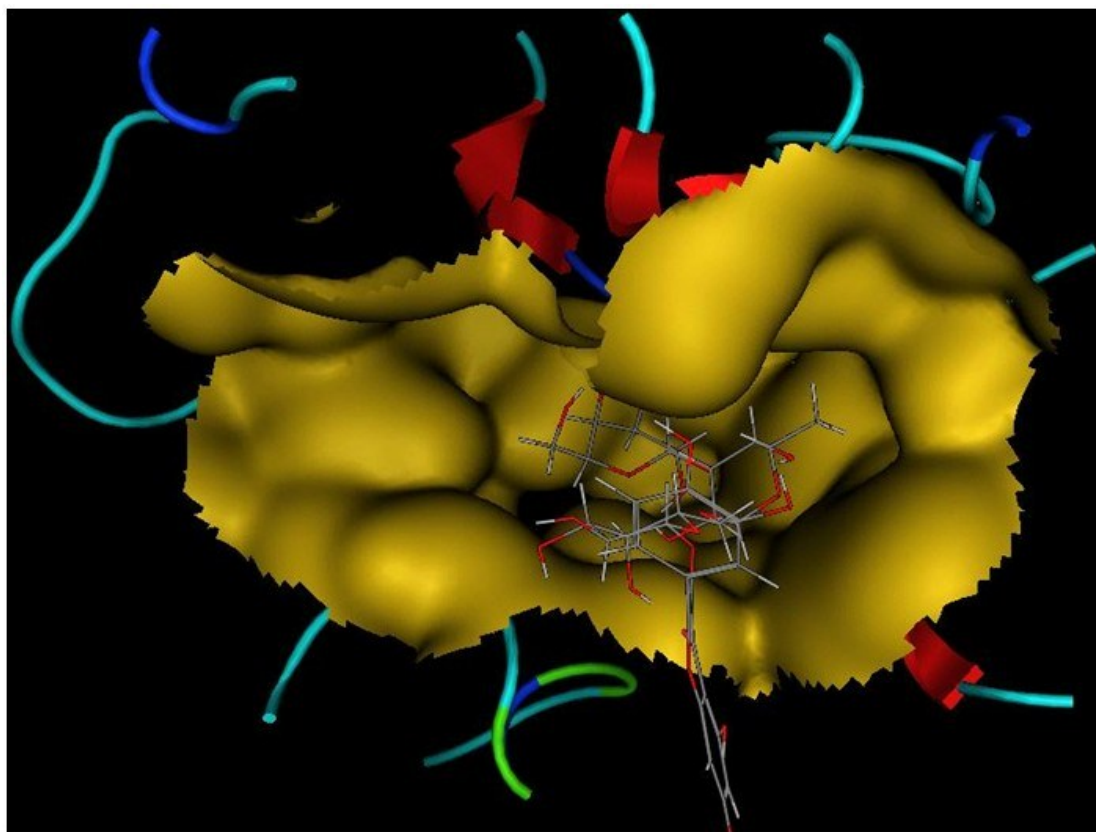

**Fig. S10** 3D pictures of the complex  $\alpha$ -amylase-8

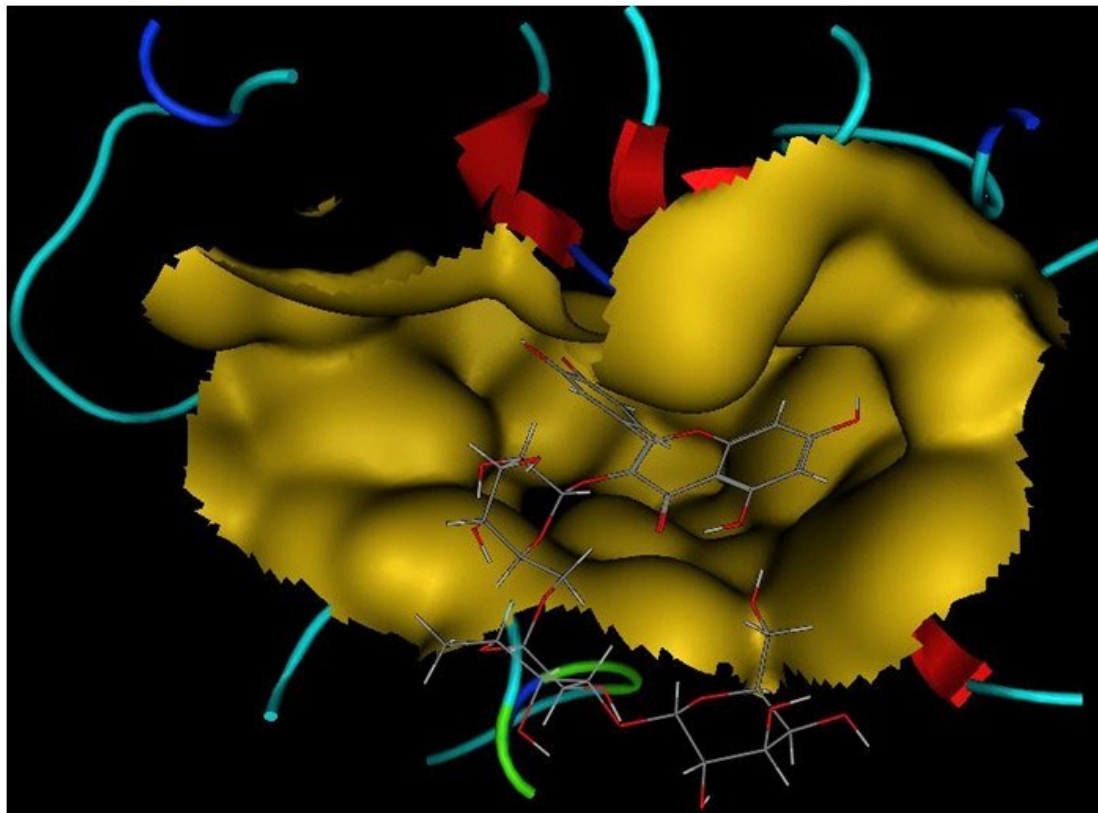

**Fig. S11** 3D pictures of the complex  $\alpha$ -amylase-9

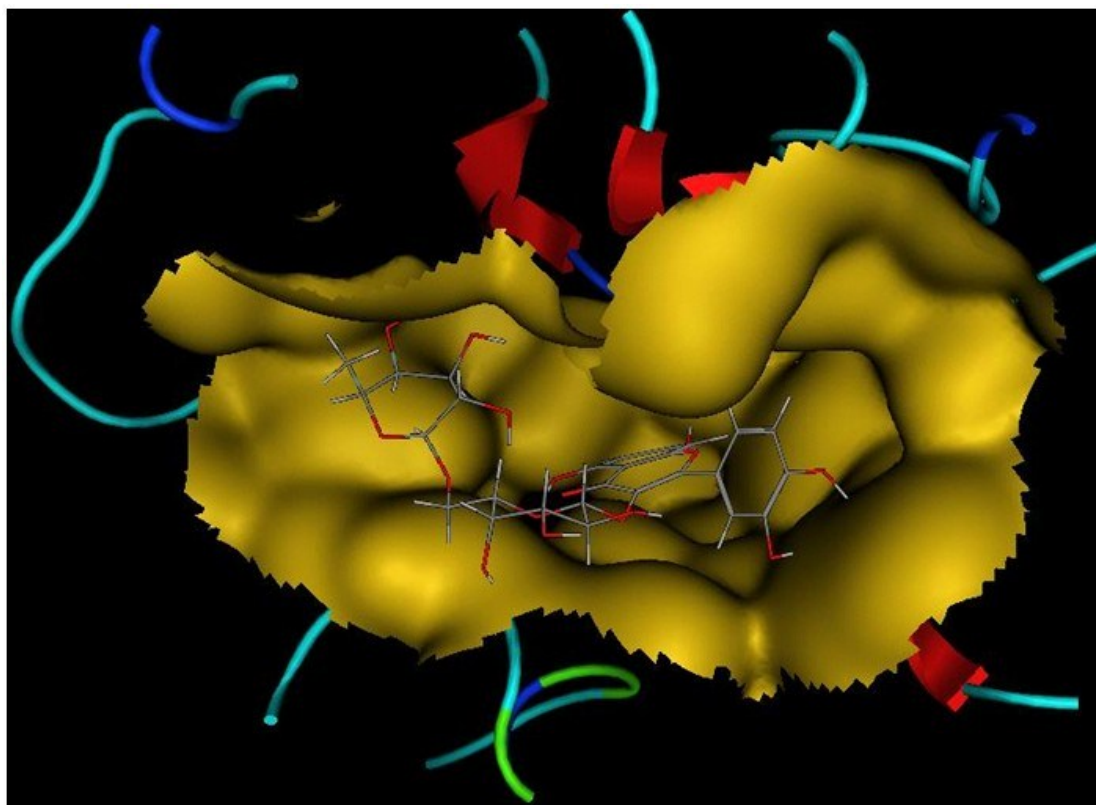

**Fig. S12** 3D pictures of the complex  $\alpha$ -amylase-13

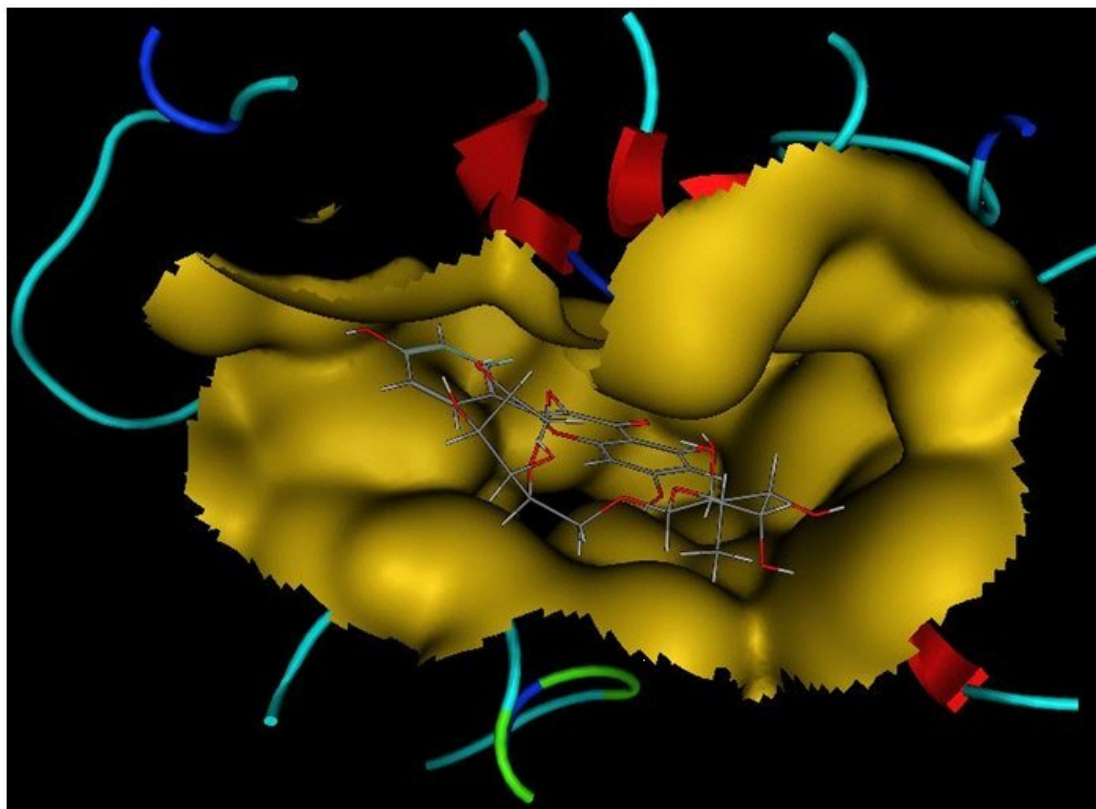

**Fig. S13** 3D pictures of the complex  $\alpha$ -amylase-14

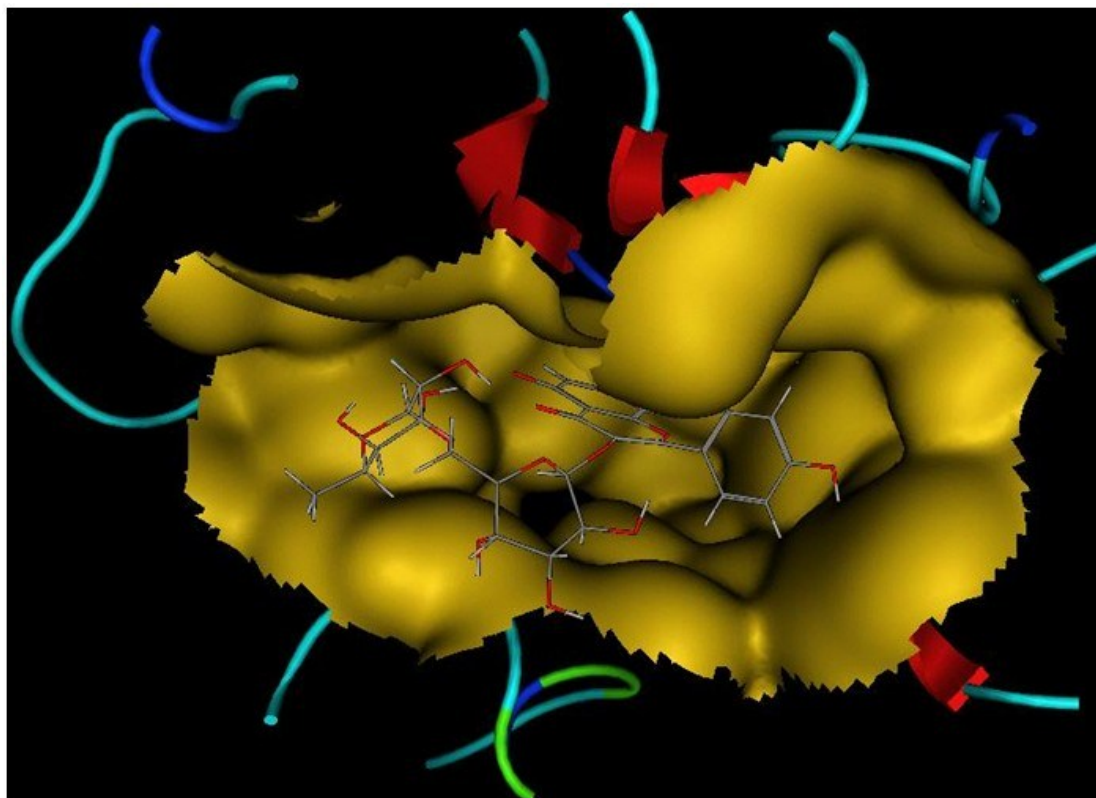

Supplement: c8fo00562a1.pdf [file c8fo00562a1.pdf]
